# Supplementary material for: High Prevalence of New Clinically Significant Findings in Patients With Embolic Stroke of Unknown Source Evaluated by Cardiac Magnetic Resonance Imaging
Source: PubMed Central journal article supplement (PMC11056130; doi:10.1161/jaha.123.031489), 2024-01-19
Supplement: JAH3-13-e031489-s001.pdf [file JAH3-13-e031489-s001.pdf]

# **SUPPLEMENTAL MATERIAL**

**Table S1. Inclusion and exclusion criteria for the CARM-AF study.**

| <i>Inclusion Criteria</i>                                                                                 | <i>Exclusion Criteria</i>                                                                                     |
|-----------------------------------------------------------------------------------------------------------|---------------------------------------------------------------------------------------------------------------|
| Acute ischaemic stroke confirmed on brain imaging within 3 months of study enrolment                      | History of atrial fibrillation                                                                                |
| Patient able to provide consent or assent following consultation from next of kin                         | eGFR < 30ml/min                                                                                               |
| Expected survival greater than 12 months                                                                  | Indication for pacemaker/implantable cardioverter-defibrillator                                               |
| CHA <sub>2</sub> DS <sub>2</sub> VASc <sub>2</sub> score ≥ 3                                              | Contra-indication to undergo cardiac MRI (eg. Severe claustrophobia, unable to lie flat for prolonged period) |
| Sinus rhythm on 12-lead-ECG, telemetry and/or 24 hour-monitor and a regular pulse on clinical examination | Carotid stenosis >50% on duplex ultrasound or CT angiography associated with anterior circulation infarct     |
| Above 18 years of age                                                                                     | Vertebrobasilar stenosis >50% on CT/MR angiography associated with posterior circulation infarction           |
|                                                                                                           | Single, isolated lacunar infarct with a corresponding lacunar infarct on brain CT/MRI                         |
|                                                                                                           | Specific aetiology for cause of stroke (eg. Arteritis, dissection, drug abuse)                                |

eGFR = estimated glomerular filtration rate, MRI = magnetic resonance imaging, ECG = electrocardiogram, CT = computed tomography

**Table S2. Characteristics of patients with and without incidental extra-cardiac findings.**

| <b>Patient Characteristic</b>               | <b>No. of patients with no clinically significant extra-cardiac finding</b> | <b>No. of patients with a clinically significant extra-cardiac finding</b> | <b>P-value</b> |
|---------------------------------------------|-----------------------------------------------------------------------------|----------------------------------------------------------------------------|----------------|
| N =                                         | 64                                                                          | 32                                                                         |                |
| Age (mean±SD)                               | 68±10                                                                       | 68±8                                                                       | 0.906          |
| Male sex (%)                                | 34 (53)                                                                     | 22 (69)                                                                    | 0.213          |
| BMI category:                               |                                                                             |                                                                            | 0.721          |
| Healthy                                     | 17 (27)                                                                     | 9 (28)                                                                     |                |
| Overweight                                  | 22 (35)                                                                     | 13 (41)                                                                    |                |
| Obese (Class I/II)                          | 22 (35)                                                                     | 8 (25)                                                                     |                |
| Morbidly obese (Class III)                  | 2 (3)                                                                       | 2 (6)                                                                      |                |
| Smoking status:                             |                                                                             |                                                                            | 0.560          |
| Non-smoker                                  | 31 (56)                                                                     | 13 (50)                                                                    |                |
| Ex-smoker                                   | 13 (24)                                                                     | 5 (19)                                                                     |                |
| Current Smoker                              | 11 (20)                                                                     | 8 (31)                                                                     |                |
| Unknown                                     | 9 (14)                                                                      | 6 (19)                                                                     |                |
| CHADS <sub>2</sub> VASc score (median ±IQR) | 5±1                                                                         | 4±1                                                                        | 0.412          |
| Hypertension (%)                            | 43 (67)                                                                     | 25 (78)                                                                    | 0.383          |
| Diabetes (%)                                | 21 (33)                                                                     | 11 (34)                                                                    | 1.000          |
| Peripheral vascular disease (%)             | 12 (19)                                                                     | 2 (6)                                                                      | 0.184          |
| Heart Failure (%)                           | 3 (5)                                                                       | 0 (0)                                                                      | 0.534          |
| Hypercholesterolaemia (%)                   | 11 (17)                                                                     | 5 (16)                                                                     | 1.000          |
| Coronary artery disease (%)                 | 9 (14)                                                                      | 1 (3)                                                                      | 0.194          |
| Multiple acute brain infarcts (%)           | 29 (45)                                                                     | 15 (48)                                                                    | 0.950          |

SD = standard deviation, BMI = body mass index, IQR = interquartile range.
